# Supplementary material
Source: Research Square preprint supplement (doi:10.21203/rs.3.rs-7042906/v1)
Supplement: Supplementary file 1 [file 513c212aa57532bb3aad2169.docx]

**Supplementary Information for**

Climatic and anthropogenic drivers of sediment transfer since the Last Glacial Maximum

Minqiao Li1,2, Huasheng Huang1,2,*, Kenji Izumi3, Wei Tan1,2, Fan Zhang4, Xia Meng1,2, and Guoping Tang1,2

1School of Geography and Planning, Sun Yat-sen University, Guangzhou, China

2Carbon-Water Observation and Research Station in Karst Regions of Northern Guangdong, School of Geography and Planning, Sun Yat-sen University, Guangzhou, China

3Yunnan Key Laboratory of Forest Ecosystem Stability and Global Change Response, Xishuangbanna Tropical Botanical Garden, Chinese Academy of Sciences, Mengla, China

4School of Geography, South China Normal University, Guangzhou, China

*Corresponding author: H. Huang (huanghsh27@mail.sysu.edu.cn, buxushuang@gmail.com)

Table of contents

**Supplementary Figure 1**: The intrinsic mode functions (IMFs) for the third stage without cyclity

**Supplementary Figure 2**: Number of records and corresponding ranges of mean sediment accumulation rates (SARs) across the five regions over the past 20,000 years, showing their trends in SARs

**Supplementary Figure 3**: The rank correlation coefficients between land use, precipitation and temperature in relation to sediment accumulation rates (SARs) in the five regions of China during the downward period of the SARs

**Supplementary Figure 4**: The rank correlation coefficients between land use, precipitation and temperature in relation to sediment accumulation rates (SARs) in the five regions of China during the stable period of the SARs

**Supplementary Table 1**: Biome type in growing sediment accumulation rates (SARs) in the first stage

**Supplementary Table 2**: Biome type in growing sediment accumulation rates (SARs) in the second stage

**Supplementary Table 3**: Mean rank correlation coefficient between land use, precipitation, temperature, plant productivity (NPP and GPP), and declining sediment accumulation rates (SARs) in the five lake regions

**Supplementary Table 4**: Mean rank correlation coefficient between land use, precipitation, temperature, plant productivity (NPP and GPP), and stable sediment accumulation rates (SARs) in the five lake regions


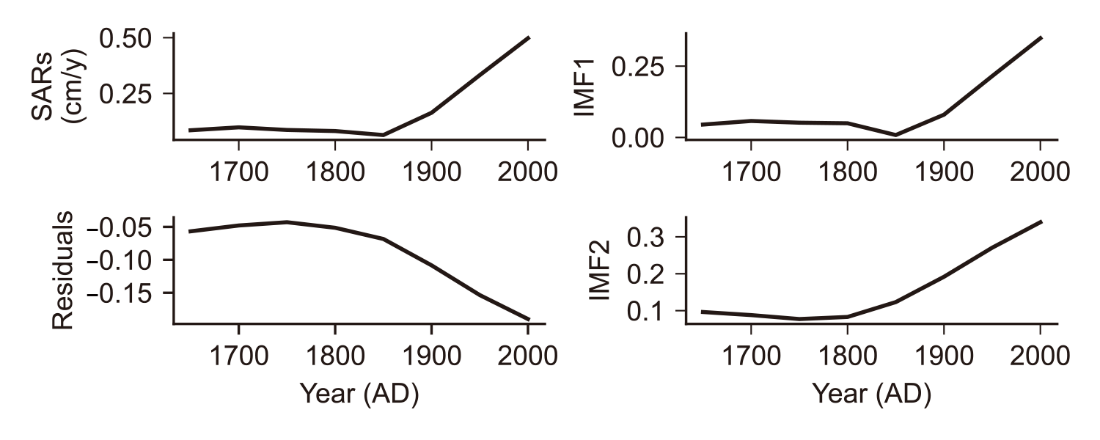


**Supplementary Figure 1: The intrinsic mode functions (IMFs) for the third stage without cyclity.**


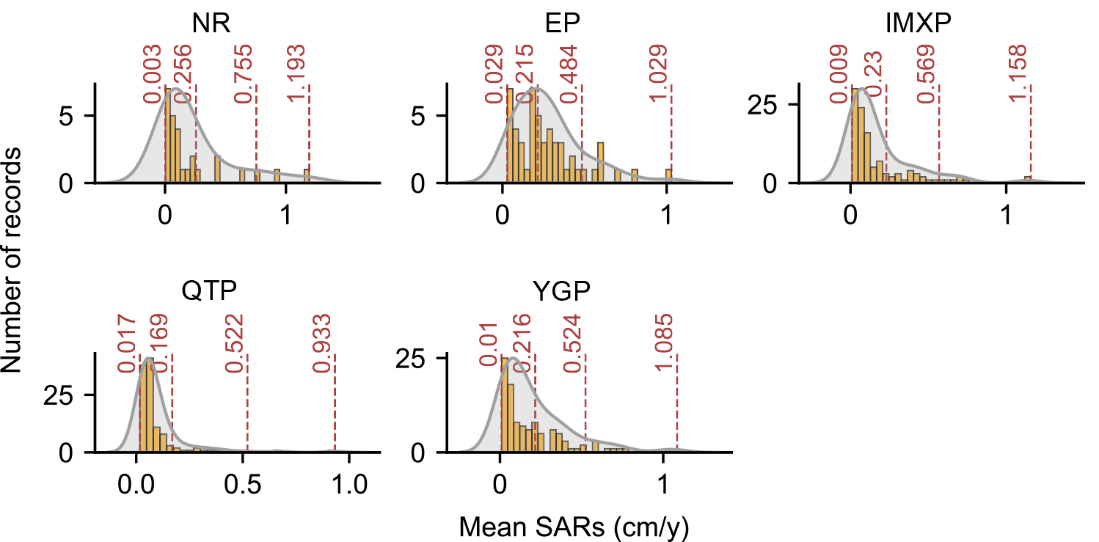


**Supplementary Figure 2: Number of records and corresponding ranges of mean sediment accumulation rates (SARs) across the five regions over the past 20,000 years, showing their trends in SARs.** Abbreviations: NR = Northeast Region, EP = Eastern Plain, IMXP = Inner Mongolia-Xinjiang Plateau, QTP = Qinghai-Tibetan Plateau, YGP = Yunnan-Guizhou Plateau.


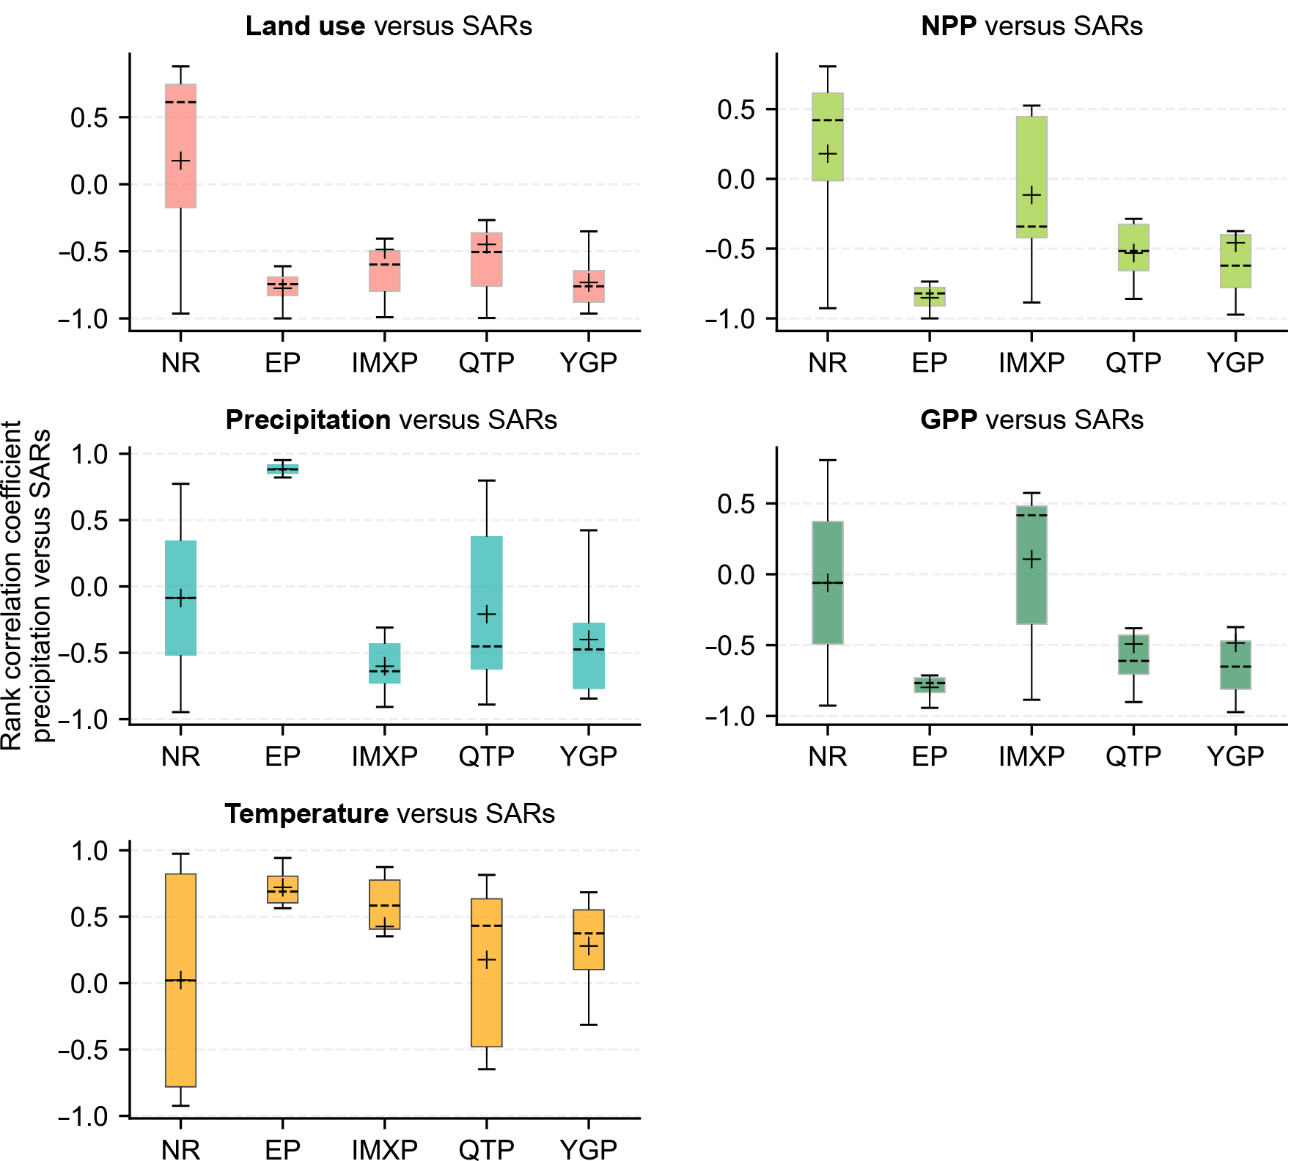


**Supplementary Figure 3: The rank correlation coefficients between land use, precipitation and temperature in relation to sediment accumulation rates (SARs) in the five regions of China during the downward period of the SARs.** Abbreviations: NR = Northeast Region, EP = Eastern Plain, IMXP = Inner Mongolia-Xinjiang Plateau, QTP = Qinghai-Tibetan Plateau, YGP = Yunnan-Guizhou Plateau.


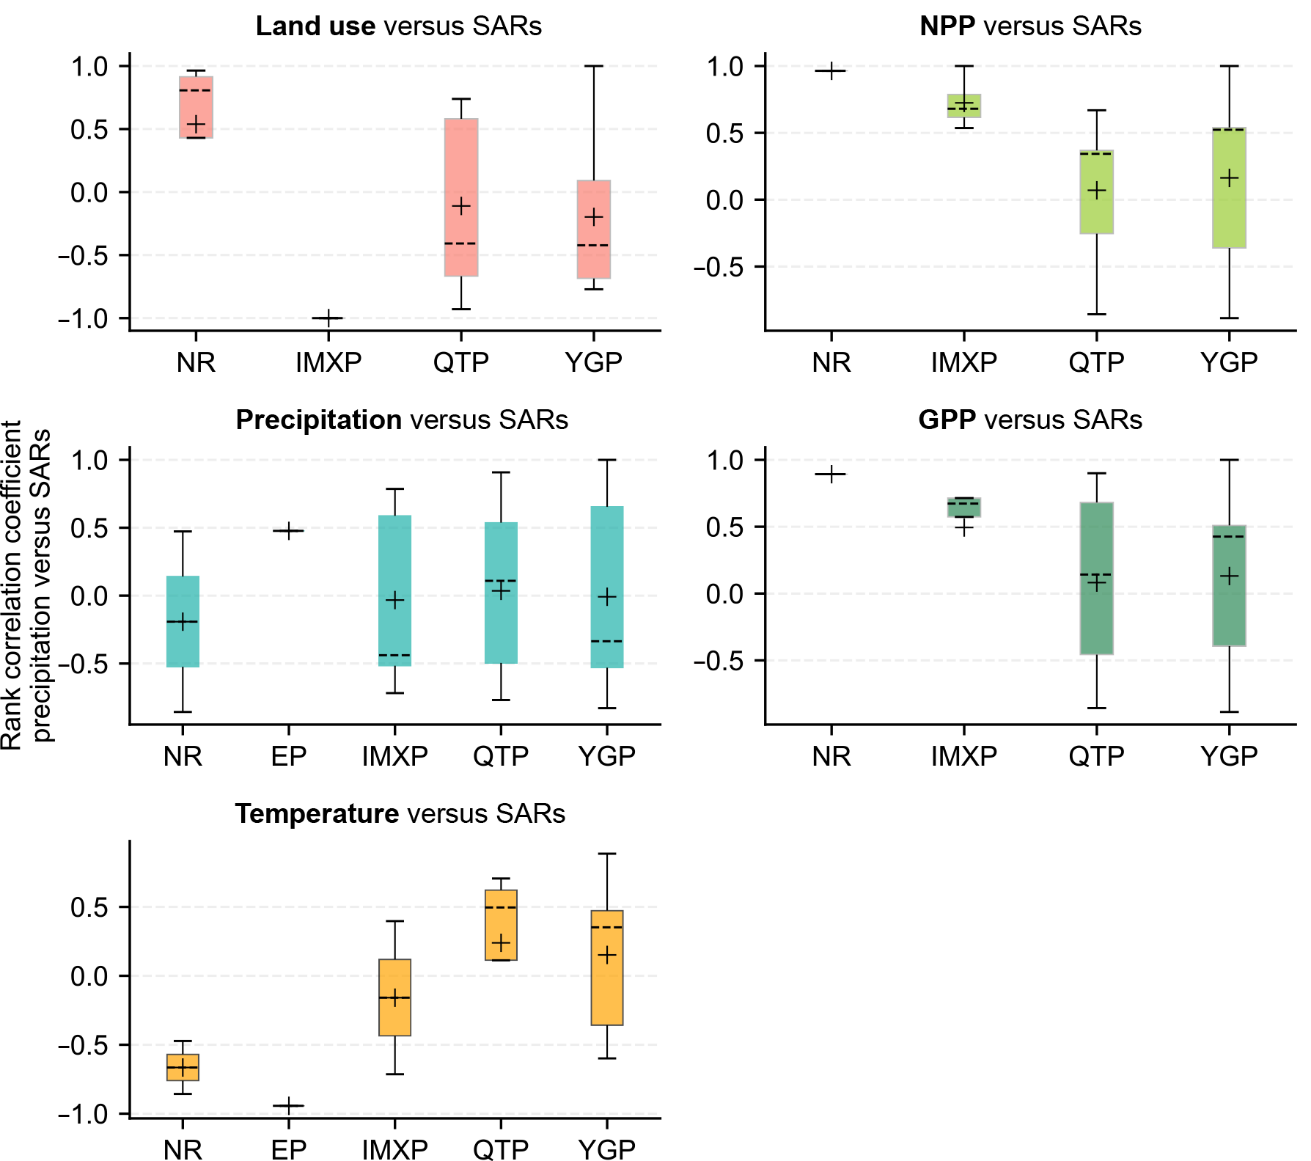


**Supplementary Figure 4: The rank correlation coefficients between land use, precipitation and temperature in relation to sediment accumulation rates (SARs) in the five regions of China during the stable period of the SARs.** Abbreviations: NR = Northeast Region, EP = Eastern Plain, IMXP = Inner Mongolia-Xinjiang Plateau, QTP = Qinghai-Tibetan Plateau, YGP = Yunnan-Guizhou Plateau. There are no sediment records for this period of the EP.

**Supplementary Table 1:** **Biome type in growing sediment accumulation rates (SARs) in the first stage.** Abbreviations: NR = Northeast Region, EP = Eastern Plain, IMXP = Inner Mongolia-Xinjiang Plateau, QTP = Qinghai-Tibetan Plateau, YGP = Yunnan-Guizhou Plateau.

| **Region** | **Biome type** | **No. of type** |
| --- | --- | --- |
| NR | Temperate grassland | 3 |
| Cold deciduous forest | 1 |
| EP | Warm-temperate evergreen broadleaf and mixed forest | 2 |
| Temperate deciduous broadleaf forest | 1 |
| IMXP | Temperate grassland | 7 |
| Desert | 5 |
| others | 4 |
| QTP | Cold deciduous forest | 12 |
| Cold evergreen needleleaf forest | 5 |
| others | 5 |
| YGP | Warm-temperate evergreen broadleaf and mixed forest | 5 |
| Cool-temperate evergreen needleleaf and mixed forest | 2 |
| others | 9 |

**Supplementary Table 2: Biome type in growing sediment accumulation rates (SARs) in the second stage.** Abbreviations: NR = Northeast Region, EP = Eastern Plain, IMXP = Inner Mongolia-Xinjiang Plateau, QTP = Qinghai-Tibetan Plateau, YGP = Yunnan-Guizhou Plateau.

| **Region** | **Biome type** | **No. of type** |
| --- | --- | --- |
| NR | Temperate grassland | 5 |
| EP | Temperate deciduous broadleaf forest | 6 |
| Warm-temperate evergreen broadleaf and mixed forest | 2 |
|  | Tropical evergreen broadleaf forest | 1 |
| IMXP | Temperate grassland | 13 |
| Desert | 13 |
| others | 10 |
| QTP | Cold evergreen needleleaf forest | 16 |
| Cold deciduous forest | 13 |
| others | 19 |
| YGP | Warm-temperate evergreen broadleaf and mixed forest | 17 |
| Cool-temperate evergreen needleleaf and mixed forest | 4 |
| others | 8 |

**Supplementary Table 3:** **Mean rank correlation coefficient between land use, precipitation, temperature, plant productivity (NPP and GPP), and declining sediment accumulation rates (SARs) in the five lake regions.** Abbreviations: NR = Northeast Region, EP = Eastern Plain, IMXP = Inner Mongolia-Xinjiang Plateau, QTP = Qinghai-Tibetan Plateau, YGP = Yunnan-Guizhou Plateau.

| **Region** | **Land use (%)** | **Precipitation  (𝛿18Op)** | **Temperature  (°C)** | **NPP  (g·m−2y−1)** | **GPP  (g·m−2y−1)** |
| --- | --- | --- | --- | --- | --- |
| NR | 0.176 | −0.087 | 0.022 | 0.180 | −0.060 |
| EP | −0.775 | 0.885 | 0.722 | −0.852 | −0.798 |
| IMXP | −0.486 | −0.601 | 0.427 | −0.115 | 0.106 |
| QTP | −0.448 | −0.209 | 0.177 | −0.532 | −0.492 |
| YGP | −0.732 | −0.400 | 0.280 | −0.458 | −0.485 |

**Supplementary Table 4: Mean rank correlation coefficient between land use, precipitation, temperature, plant productivity (NPP and GPP), and stable sediment accumulation rates (SARs) in the five lake regions.** Abbreviations: NR = Northeast Region, EP = Eastern Plain, IMXP = Inner Mongolia-Xinjiang Plateau, QTP = Qinghai-Tibetan Plateau, YGP = Yunnan-Guizhou Plateau.

| **Region** | **Land use  (%)** | **Precipitation  (𝛿18Op)** | **Temperature  (°C)** | **NPP  (g·m−2y−1)** | **GPP  (g·m−2y−1)** |
| --- | --- | --- | --- | --- | --- |
| NR | 0.539 | −0.192 | −0.665 | 0.964 | 0.893 |
| EP | 0 | 0.477 | −0.943 | 0 | 0 |
| IMXP | −1.000 | −0.033 | −0.158 | 0.724 | 0.494 |
| QTP | −0.110 | 0.035 | 0.239 | 0.070 | 0.082 |
| YGP | −0.197 | −0.008 | 0.152 | 0.163 | 0.131 |
